# Supplementary material for: Substrate factors that influence the synergistic interaction of AA9 and cellulases during the enzymatic hydrolysis of biomass
Source: Royal Society of Chemistry journal article supplement (doi:10.1039/c4ee00891j), 2014-01-01
Supplement: c4ee00891j7.pdf [file c4ee00891j7.pdf]

Table S2. Physical characterization of pretreated substrates.

| Pretreated substrates | Accessibility<br>(SS <sup>c</sup> ) | CrI <sup>a</sup><br>(XRD <sup>d</sup> ) | Gross fiber characteristics |                      | DPw <sup>b</sup><br>(GPC <sup>g</sup> ) |
|-----------------------|-------------------------------------|-----------------------------------------|-----------------------------|----------------------|-----------------------------------------|
|                       |                                     |                                         | AL <sup>e</sup> (mm)        | AW <sup>f</sup> (μm) |                                         |
| SPCS                  | 36                                  | 60%                                     | 0.45                        | 19.4                 | 1596                                    |
| SPP                   | 35                                  | 62%                                     | 0.30                        | 21.2                 | 1154                                    |
| SPLP                  | 24                                  | 47%                                     | 0.45                        | 28.6                 | 892                                     |
| OPCS                  | 53                                  | 67%                                     | 0.53                        | 18.9                 | 1768                                    |
| OPP                   | 44                                  | 64%                                     | 0.46                        | 22.4                 | 1591                                    |
| OPLP                  | 33                                  | 57%                                     | 1.81                        | 32.4                 | 1563                                    |

<sup>a</sup>CrI: cellulose crystallinity; <sup>b</sup>DPw: Cellulose degree of polymerization; <sup>c</sup>SS: Simons' staining; <sup>d</sup>XRD: X-ray diffraction; <sup>e</sup>Average length; <sup>f</sup>Average width; <sup>g</sup>GPC: gel permeation chromatography;

SP/OP- CS, P, and LP: Steam and organosolv pretreated corn stover, poplar and lodgepole pine.
