# Supplementary figures and images for: Substrate factors that influence the synergistic interaction of AA9 and cellulases during the enzymatic hydrolysis of biomass
Source: Royal Society of Chemistry journal article supplement (doi:10.1039/c4ee00891j), 2014-01-01

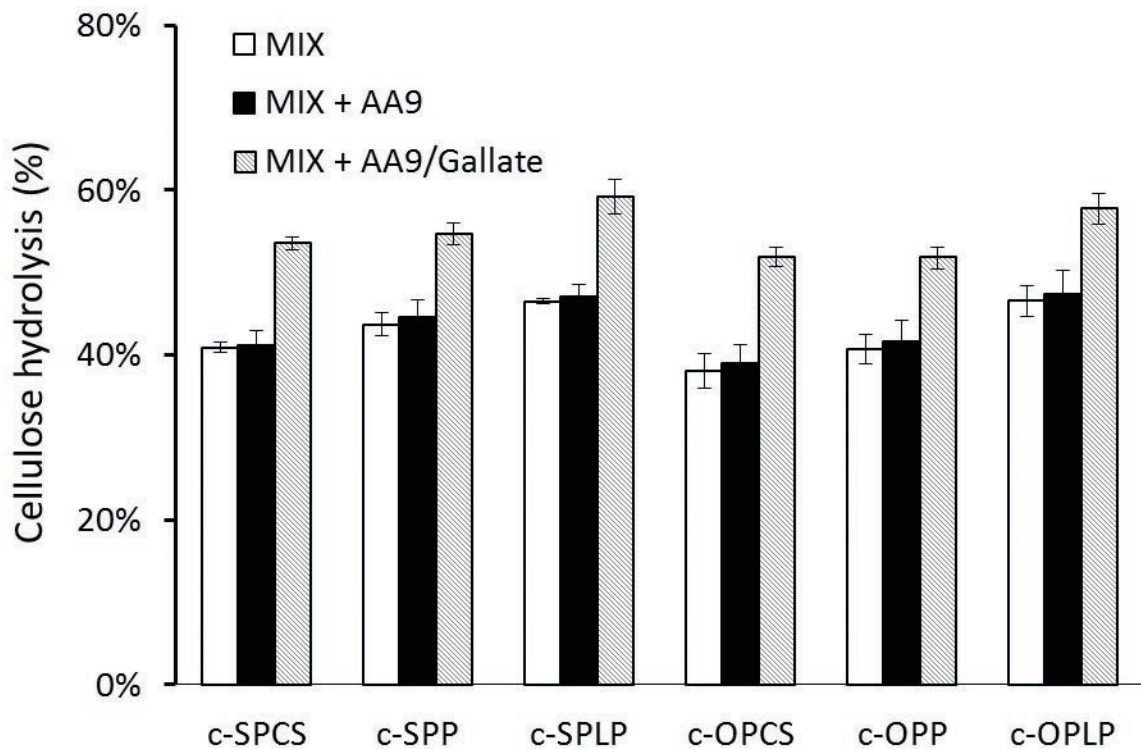

Supplement: c4ee00891j2.pdf [file c4ee00891j2.pdf]

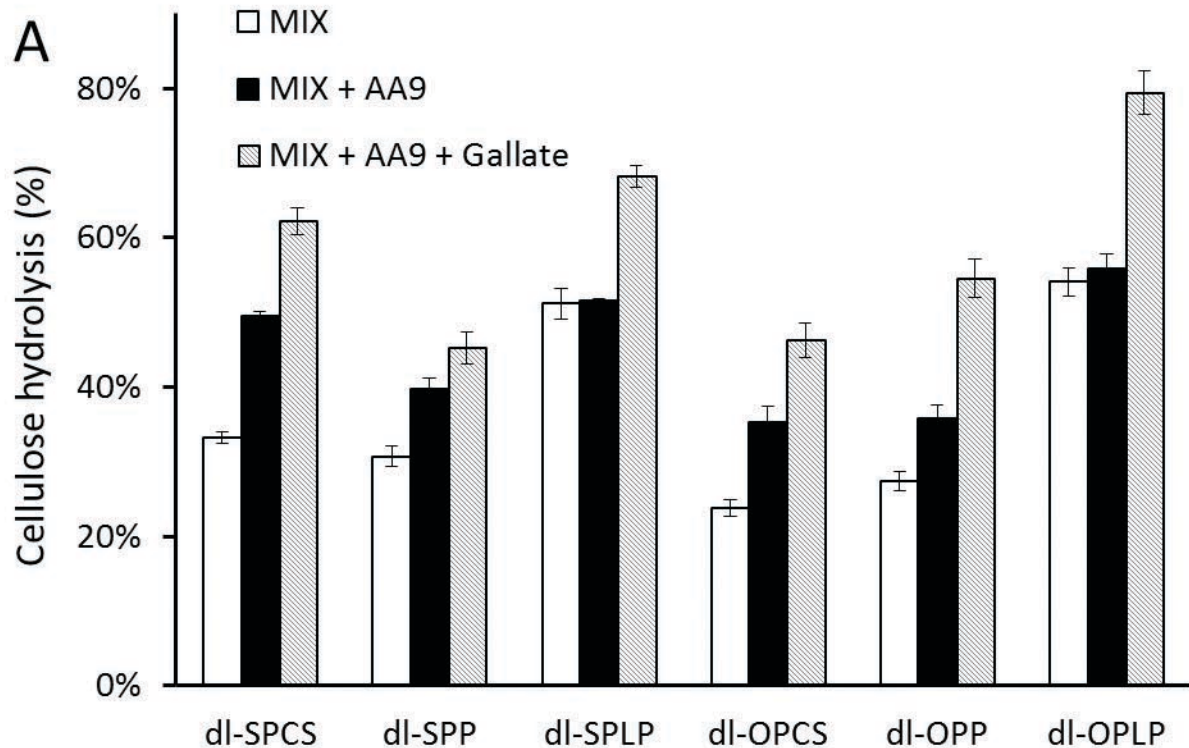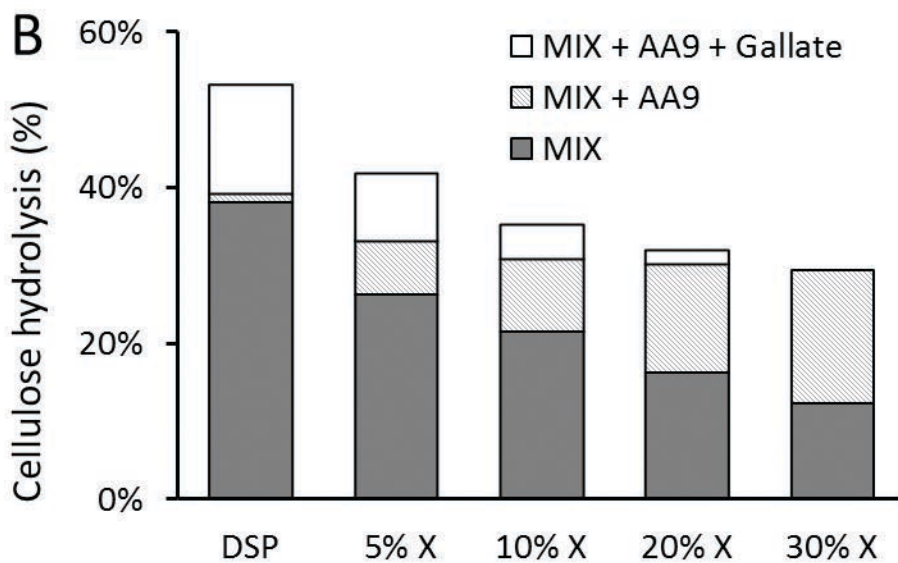

Supplement: c4ee00891j3.pdf [file c4ee00891j3.pdf]

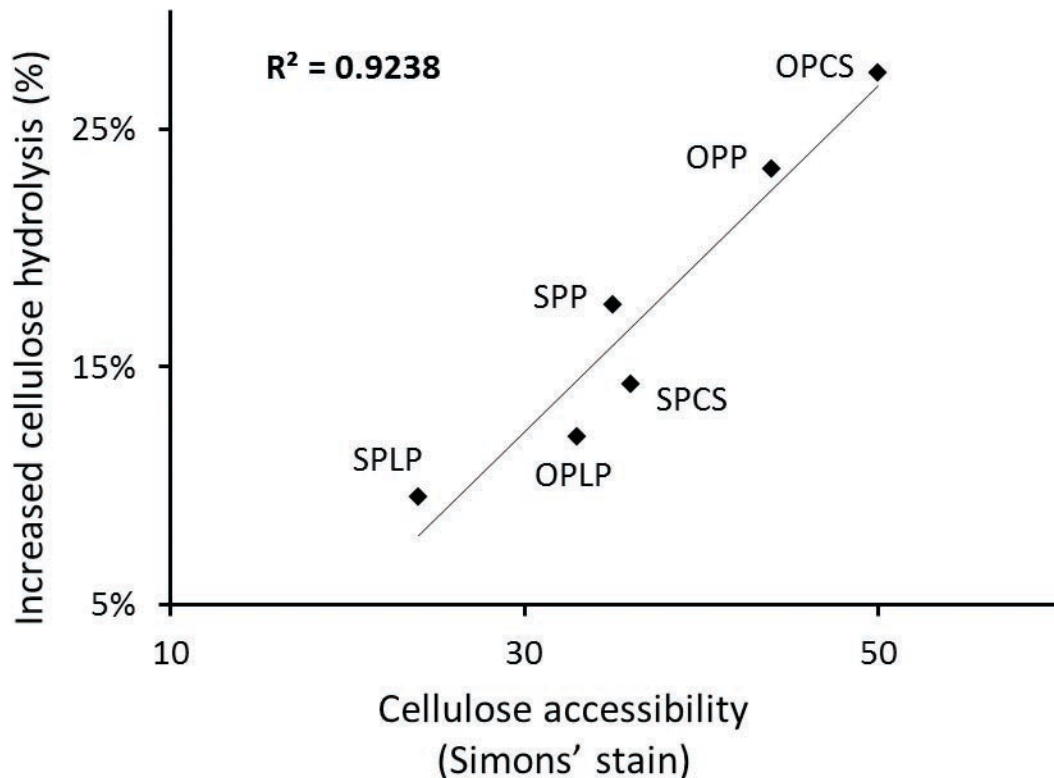

Supplement: c4ee00891j4.pdf [file c4ee00891j4.pdf]
